# Supplementary material
Source: publisher figshare collection journal article supplement (https://geolsoc.figshare.com/ndownloader/files/12297002)
Supplement: Supplementary file 1 [file 12297002]

## Sheet: Clinopyroxene
Table 3. Representative microprobe analyses of clinopyroxene in the Aladag peridotites and chromitites
Lithology	Analysis No.	SiO2	TiO2	Al2O3	Cr2O3	FeO	MnO	MgO	CaO	Na2O	K2O	NiO	Total	Wo	En	Fs	Mg#
Harzburgite	3-3-4	54.83	b.d.	1.191	0.55	1.801	0.063	17.9	23.204	0.065	0.008	0.06	99.672	46.7	50.12	2.94	94.6344
	3-3-7	54.639	0.01	1.195	0.677	1.808	0.048	17.876	23.299	0.074	b.d.	0.061	99.687	46.82	49.98	2.92	94.6127
	3-3-9	54.39	0.024	1.237	0.619	1.601	0.046	17.817	23.48	0.083	0.012	0.058	99.367	47.23	49.87	2.59	95.188
	3-3-11	54.771	b.d.	1.241	0.581	1.758	0.052	17.878	23.622	0.063	b.d.	0.043	100.009	47.22	49.72	2.83	94.7564
	3-3-13	54.291	b.d.	1.177	0.595	1.822	0.051	17.893	23.139	0.058	0.017	0.039	99.082	46.65	50.19	2.96	94.5804
	3-3-21	54.331	0.008	1.381	0.623	1.883	0.1	17.729	23.206	0.076	b.d.	0.021	99.358	46.82	49.77	3.13	94.3587
	3-3-39	54.388	0.011	1.223	0.692	1.707	0.084	17.916	22.941	0.072	b.d.	0.045	99.079	46.44	50.46	2.84	94.9065
	3-3-40	54.741	b.d.	1.386	0.674	1.873	0.065	17.896	22.965	0.062	b.d.	0.034	99.696	46.4	50.31	3.07	94.4293
	3-4-11	54.253	b.d.	1.235	0.671	1.743	0.047	17.502	23.456	0.076	b.d.	0.029	99.012	47.53	49.35	2.84	94.6899
	3-4-13	54.371	0.029	1.214	0.614	1.811	0.047	17.642	23.22	0.082	0.007	0.005	99.042	47.03	49.72	2.95	94.5343
	3-4-15	54.435	0.039	1.162	0.668	1.817	0.068	17.55	23.423	0.093	b.d.	0.031	99.286	47.33	49.34	2.99	94.4908
	3-5-1	54.677	0.009	1.367	0.706	1.926	0.037	17.814	23.221	0.039	0.013	0.051	99.86	46.8	49.95	3.1	94.2583
	3-5-8	54.653	b.d.	1.145	0.541	1.835	0.082	17.664	23.119	0.074	b.d.	0.036	99.149	46.86	49.82	3.05	94.4669
	3-6-7	54.317	b.d.	1.162	0.705	1.682	0.049	17.431	24.968	0.087	b.d.	0.059	100.46	49.22	47.81	2.66	94.8682
	3-6-9	54.625	0.011	0.844	0.514	1.687	0.051	17.736	23.949	0.059	b.d.	0.048	99.525	47.81	49.26	2.72	94.9221
	3-7-6	54.129	b.d.	1.191	0.674	1.801	0.106	17.292	25.395	0.077	0.016	0.018	100.699	49.72	47.1	2.91	94.4917
	3-7-9	54.349	0.025	1.288	0.631	1.996	0.082	17.635	24.412	0.085	0.01	0.075	100.588	48.13	48.37	3.2	94.0326
	3-8-1	54.116	0.03	1.509	0.736	1.784	0.109	17.882	23.295	0.059	b.d.	0.027	99.547	46.81	50	2.98	94.6886
	3-8-15	53.416	0.022	0.966	0.424	2.007	0.06	18.183	24.65	0.057	b.d.	0.04	99.825	47.72	48.98	3.11	93.0544
Mantle Chromitite	15-17-5	54.361	0.094	0.653	1.499	1.243	0.124	17.884	24.502	0.121	0.015	0.068	100.564	48.36	49.11	2.1	96.2822
	15-17-17	54.4	0.103	0.556	1.227	1.281	0.047	17.785	24.757	0.112	0.026	b.d.	100.294	48.79	48.77	2.05	96.1525
